# Supplementary material for: Metabolomics- and systems toxicology-based hepatotoxicity mechanism of Sophorae Tonkinensis Radix et Rhizoma in rats
Source: Front Pharmacol. 2022 Nov 18;13:1015008. doi: 10.3389/fphar.2022.1015008 (PMC9717682; doi:10.3389/fphar.2022.1015008)
Supplement: Supplementary file 1 [file Table3.XLSX]

## Sheet: dose
sample	CA	DCA	CDCA	TUDCA	TDCA	TCDCA	TCA	GCA	GCDCA	HDCA	UDCA	GDCA	TLCA	THDCA	LCA	GUDCA
control-1	964	168.4	764	80.4	129.2	114.8	185.6	92.8	103.6	884	72	98	101.6	211.2	92.4	62.4
control-2	92.8	10.16	102	84	145.6	140	192.8	126	104.8	324.8	23.8	98	101.6	247.2	92	62
control-3	154.4	73.6	217.2	80.8	129.2	100.4	120.4	74	101.2	512	36.12	97.2	101.2	216	90.4	62
control-4	640	61.6	322	88	172.8	220	316	124.8	109.2	269.6	44.4	99.6	102.4	228	93.2	62.4
control-5	792	103.2	87.6	80	122.4	81.6	131.2	112.4	102	628	23.92	112	100.4	164	96.4	61.6
control-6	200.4	20	44.4	81.6	127.2	155.2	298.8	144.8	105.6	293.2	17.52	96.4	104.4	178	103.6	62.8
control-7	166.8	20.2	103.6	83.2	117.6	186.8	209.6	123.6	114	432	28.04	94.8	104.8	232.8	101.2	62.4
control-8	1808	106	2100	82.8	125.2	244	279.2	84.4	105.6	1452	42.8	95.2	110	317.2	115.2	62
control-9	153.2	20	23.44	82.4	118.8	132.4	244.8	123.2	104	211.2	16.08	95.6	102.4	154	95.6	62
control-10	144.4	42.8	162.8	84.4	123.6	229.6	242.4	136.4	122	604	35.76	94.8	105.6	289.2	130.8	62.4
DCME-L-1	616	57.6	305.6	79.6	116	90.4	126	70.8	100.4	257.6	30.76	96	101.2	141.6	97.6	62
DCME-L-2	207.6	10	34.96	80.8	116.8	83.2	106	71.2	99.2	304.4	19.12	96.4	100.8	161.6	94.8	62
DCME-L-3	576	58	166.8	81.2	121.6	87.6	123.6	127.6	105.6	278	52	110.4	100.8	146.4	93.6	62.4
DCME-L-4	692	120	159.6	82.8	127.6	82.8	173.6	72	99.6	720	35.28	97.2	100.8	186.4	92.4	62
DCME-L-5	712	94	360	84	127.6	109.2	212.4	68.8	100	70.8	70.4	94.8	100.8	120.8	93.2	62
DCME-L-6	1120	77.6	1200	82.8	118	186.4	246	86.4	104.4	820	37.8	96	102.8	252.8	93.6	62
DCME-L-7	468	24.68	648	84.4	132	324	728	436	146	504	19	96.4	104	424	95.2	62
DCME-L-8	544	124.4	1064	86.4	128.8	290.4	396.8	110.8	113.2	249.6	29.52	95.2	105.6	174.8	109.6	62
DCME-L-9	516	56	1928	83.6	117.2	237.2	211.6	132	127.6	640	27	95.2	103.6	195.6	98.4	62
DCME-L-10	992	36.64	1548	84	114	152.8	153.6	71.2	102.8	359.6	31.52	94.4	102.8	140.8	97.2	62
DCME-M-1	204.4	40	42.8	79.6	111.6	88.4	124.4	78.8	100.8	136	23.24	95.2	100	134	93.2	62
DCME-M-2	246	11.88	101.2	79.6	112.8	83.6	102.4	87.2	103.2	223.6	24.6	102.4	101.2	143.2	93.2	62
DCME-M-3	636	20.8	173.6	79.2	111.2	93.2	170	68.4	99.6	134	25.72	95.2	100.4	128.8	93.2	61.6
DCME-M-4	273.6	47.6	280.8	81.2	114.8	88.4	148	74.8	100	315.2	28.64	95.6	100.8	146.4	92.4	62
DCME-M-5	253.2	40	259.6	80.4	114	87.2	145.2	72.8	100	287.2	26.44	96	100.8	142.4	97.2	62
DCME-M-6	1004	68	520	80.8	112.8	125.2	202.8	172.8	119.6	120.8	19.84	102.8	102.8	123.6	97.2	62
DCME-M-7	640	22.84	1044	80.8	111.2	123.2	134	70	103.2	528	23.88	95.2	101.2	142.8	102.4	62
DCME-M-8	1240	7.4	804	83.2	109.6	194.4	272	78	101.2	672	15.84	94.4	102.4	246	95.6	62
DCME-M-9	2156	36.44	2988	84	112.4	200.4	262.4	119.6	118	1208	29.52	95.6	104	205.6	105.6	62
DCME-M-10	2024	100.4	4200	83.6	114.4	194.4	263.2	76	105.6	1556	39.92	94.8	105.2	174.4	149.2	62
DCME-H-1	2460	152	1320	80	109.2	90.8	142.4	123.6	115.6	908	65.2	102.8	100.8	138.4	93.6	62.4
DCME-H-2	3424	344.4	1796	81.6	114.8	103.2	200	299.2	143.2	2676	114.8	128	102	172	116	65.2
DCME-H-3	2256	120.4	1176	80.4	108.4	97.6	195.6	155.2	118	976	54.8	101.2	100.8	139.2	98.8	62.8
DCME-H-4	1596	169.2	263.2	81.6	118	88.8	190.4	156.4	104.8	484	29.4	107.2	100.4	157.2	98	62
DCME-H-5	3480	134	1500	87.6	118.4	144.4	700	256.4	134.4	668	76.4	102.4	101.2	165.6	94	63.2
DCME-H-6	2404	428	3952	87.6	116.8	158.4	234.4	101.6	110.8	2048	110	99.2	106	172.4	130.4	62.4
DCME-H-7	1460	208.4	3016	85.2	109.6	144.8	171.2	70.4	104	1348	54	95.6	105.6	146	116	62
DCME-H-8	1072	163.2	3400	86	111.2	180.8	168.4	78.4	114	1240	70.4	96.4	104.8	154.4	112	62
DCME-H-9	1620	266.4	2052	83.2	112	126.8	173.6	104.8	110.4	1268	92.4	98.8	102.4	148.4	110.4	62
DCME-H-10	1260	164.4	2496	82.4	115.6	131.2	146.4	68	102.8	1092	46.8	94	104.4	137.6	110	62
EPE-H-1	972	238.4	1216	89.2	123.2	124.4	155.6	123.6	128	1880	185.2	118	104	198	116.8	64
EPE-H-2	804	165.6	752	82.4	113.6	94	131.6	90.8	108.4	936	89.2	102.8	105.6	146.4	97.6	62
EPE-H-3	772	156.8	1224	84.4	114.4	108.8	137.6	110.4	123.2	912	154.4	110.4	101.6	149.6	104	63.6
EPE-H-4	1132	239.6	2340	84.4	116.4	121.6	148.4	130.8	135.2	1072	158.8	111.2	102	143.6	103.6	63.6
EPE-H-5	764	174	1500	85.6	118.4	133.2	188.8	84	116	1012	106.8	100	102	151.6	97.6	63.2
EPE-H-6	1236	53.6	3784	86	113.6	192	154.8	92	149.6	1004	50.8	96.4	106	135.6	140.4	63.2
EPE-H-7	2040	150.4	6520	89.6	115.6	476	436	210	239.6	1136	133.2	101.6	107.6	170.4	141.6	65.2
EPE-H-8	1792	134.4	5800	90.4	112.4	460	440	206.4	236.4	844	126.4	101.2	106	166.8	126.8	65.6
EPE-H-9	1248	111.6	3160	84.4	107.6	141.2	159.6	80.8	110.4	1400	62.8	95.6	104.8	151.2	152.8	62.4
EPE-H-10	1664	143.6	5080	89.6	110.8	327.6	328.8	152.4	183.6	1224	109.6	98	106	166.8	140.4	63.6
AE-1	2676	776	4520	141.6	246	552	1148	208.4	159.2	3652	492	125.6	116	592	183.6	65.6
AE-2	1028	145.2	1216	81.6	114	112.4	167.6	83.6	105.2	632	59.6	99.6	100.8	140.4	94	62.4
AE-3	2580	397.2	4880	92.8	122.8	183.2	307.2	245.6	201.6	3064	207.6	125.6	105.6	205.2	200.8	65.2
AE-4	2348	260.8	4200	84.8	114	145.2	209.6	210.8	172.8	1692	210.8	113.2	103.2	146.4	144.8	64.4
AE-5	1212	156	2076	79.6	109.2	99.2	118	79.6	114	912	87.6	99.2	101.6	124.4	97.6	62
AE-6	1968	74.4	2784	84.4	115.2	150	254.8	134.8	124.4	1364	53.2	96.8	101.2	167.6	102	62.4
AE-7	1148	21.28	2192	84.8	110.8	152.8	186.8	137.2	144.8	636	27.88	96.4	101.2	134	98	62
AE-8	3580	117.6	2160	94.8	113.6	213.6	892	272.8	134.4	1540	60.4	98.4	102	247.6	130	62.8
AE-9	3188	213.2	10160	91.6	111.6	314.8	310.4	178.4	212.8	2412	222.8	101.2	104.8	179.6	165.2	63.2
AE-10	2560	158.8	6120	88.4	112	146.8	130.4	163.6	209.2	2416	83.6	100.8	103.2	139.6	181.2	64.8
QC50-1	45.1	50.3	45.2	49.2	58.4	48.9	51.3	45.4	55.3	49	43	52.3	55.6	57.7	58.4	44.6
QC500-2	470	741	598	466	465	438	482	418	440	470	537	414	447	454	451	406
QC2500-3	2220	3480	3230	2550	2500	2480	2700	2300	2350	2540	2890	2280	2460	2530	2680	2240
QC50-4	46	50.4	44.7	49.7	58.9	50.1	51.5	46.3	54.9	49.4	44.4	53.8	55.8	57.9	57.1	45.3
QC500-5	479	735	612	440	449	432	467	417	431	463	530	416	441	433	466	399
QC2500-6	2360	3610	3280	2530	2550	2480	2660	2410	2430	2640	2950	2350	2510	2510	2730	2320
QC50-7	44.8	49.2	45.6	45.3	55.7	47.8	47.1	45.8	54.9	47.6	44.5	53.3	55.2	57	56.1	43.5
QC500-8	485	742	601	424	434	423	432	420	437	484	542	422	434	422	473	406
QC2500-9	2300	3500	3170	2370	2350	2290	2390	2230	2300	2520	2870	2310	2330	2330	2520	2240
QC50-10	45.6	50.4	46.5	51.8	59.7	50.1	53.5	46.9	55.4	48.2	43.2	53.6	58.4	58.8	56.5	44.7
QC500-11	483	754	614	492	504	470	513	434	446	466	542	450	492	483	488	422
QC2500-12	2140	3320	3080	2620	2640	2520	2830	2390	2430	2440	2760	2300	2550	2650	2710	2270
QC50-13	44.9	51.1	44.8	54	59.5	48.9	50.3	45.3	54.8	47.5	42.1	51.9	56.5	59.2	57.5	44.6
QC500-14	478	734	605	463	454	433	483	415	429	455	521	410	444	444	480	396
QC2500-15	2210	3470	3180	2750	2720	2560	2780	2410	2440	2560	2870	2370	2560	2650	2740	2320

## Sheet: time
sample	CA	DCA	CDCA	TUDCA	TDCA	TCDCA	TCA	GCA	GCDCA	HDCA	UDCA	GDCA	TLCA	THDCA	LCA	GUDCA
D7-control-1	444	74.8	128	85.2	134.8	125.2	230.8	79.2	100.4	182.8	33.36	96.8	100.8	150	91.6	62
D7-control-2	568	77.6	204.8	82	137.2	121.2	205.2	92.8	103.6	173.2	39.44	98.4	100	149.2	91.2	62
D7-control-3	371.2	115.6	37.16	80	132	80.4	155.6	109.2	101.2	183.2	26.68	105.6	100.8	133.6	90.8	62
D7-control-4	140	72	55.6	80.4	165.2	136.8	241.2	170	110.8	72	23.12	105.6	101.2	130	90	62.4
D7-control-5	286.8	40	49.6	82.8	119.6	137.6	290.4	85.2	101.2	432	16.84	95.2	100.4	224	93.2	62
D7-control-6	245.6	34.44	520	83.6	134.8	291.2	268	114	115.6	390.8	31.44	98	112	216.4	120.4	62.8
D7-control-7	932	101.2	572	86.4	160.4	225.2	259.6	82.8	105.2	624	39	98	109.6	253.2	110.4	62
D7-control-8	128.8	46.8	119.6	88	185.2	504	624	120.8	116	236	18.68	98	109.6	284.8	108	62.4
D7-control-9	1800	148.8	2396	82.4	121.6	217.2	199.2	74	104.4	1860	102	95.2	108	314	119.2	62
D7-control-10	133.2	5	516	80	108.4	234	153.2	106.8	120.4	334	30.2	94.4	102.4	196	99.6	62.4
D7-EPE-H-1	1412	106	584	86.4	130.4	178.4	552	393.2	172.4	472	56	115.6	101.6	192	93.2	63.6
D7-EPE-H-2	3628	110.4	6560	83.6	111.6	372.4	628	1800	1096	1740	167.2	141.6	101.6	201.2	106.8	76.8
D7-EPE-H-3	6640	314.4	10520	88.4	114.4	309.2	688	2912	1420	4800	384.8	209.2	104.4	231.2	159.6	82.4
D7-EPE-H-4	1688	98.4	1932	87.2	116	226.4	472	1076	472	936	87.2	143.2	101.2	175.2	93.6	66.8
D7-EPE-H-5	6360	284.4	9720	88	114	293.2	652	2788	1304	4480	305.2	203.2	104	218.4	159.6	91.6
D7-EPE-H-6	2408	23.32	4520	88.4	114	728	468	291.6	334.4	1424	106.8	94.8	106.4	364	114.8	63.2
D7-EPE-H-7	3476	46.4	3788	87.6	114.4	260.4	309.2	336.4	243.6	1924	54.4	96.4	105.2	222.4	143.2	64
D7-EPE-H-8	2000	40	3156	84	108	178.8	166.8	131.2	165.2	732	54.8	94.4	101.2	136.4	104	63.2
D7-EPE-H-9	4120	140	10720	97.2	109.6	1220	860	1576	2320	1492	133.6	94.4	105.6	263.2	123.6	89.2
D7-EPE-H-10	3676	178.8	12520	85.2	109.6	524	295.2	628	956	1736	144.8	108.4	103.6	166.8	176	69.6
D7-DCME-H-1	1292	249.2	4680	90.8	123.6	271.2	273.2	588	576	1772	135.2	168.4	101.2	193.2	107.2	73.2
D7-DCME-H-2	2084	128.4	2944	91.2	117.2	247.6	480	516	312.8	1132	98	120.4	100.8	168.4	93.2	68.4
D7-DCME-H-3	5040	206.8	4440	92	115.6	220.4	556	1528	568	3240	170	155.2	102	254.8	114.8	75.6
D7-DCME-H-4	608	41.2	346.4	88.8	140.8	268	400	377.2	191.2	656	26.44	106.4	102.8	316	92.4	63.6
D7-DCME-H-5	1684	198.4	346.8	88	150	148	744	328.4	127.6	544	43.6	119.2	101.2	201.6	94.4	62.8
D7-DCME-H-6	1340	17.92	848	92.4	112.4	262.4	468	312	150	912	27.28	97.2	102.8	238.8	103.6	63.6
D7-DCME-H-7	1856	31.24	307.6	88.8	118.8	206.4	1180	323.2	113.6	370.4	27.16	98.4	100.4	201.2	90.4	62.8
D7-DCME-H-8	7640	349.2	2632	92	114.8	191.2	700	1056	227.6	4080	111.2	122.8	102.8	329.6	158.4	67.6
D7-DCME-H-9	1160	174.8	352.8	90.8	131.2	217.6	624	572	149.2	1080	51.6	112	102.8	348	104	62.8
D7-DCME-H-10	1764	101.2	1228	93.6	135.2	343.6	1016	301.6	139.2	940	35.4	100	103.2	306	98.8	62.4
D7-AE-1	4880	79.2	1328	84.8	115.2	171.6	1112	3172	341.6	1252	69.2	131.6	100.4	242.4	91.2	68.4
D7-AE-2	512	80	109.2	91.2	116.4	231.6	640	448	138.4	226.8	23.48	99.6	100.4	222	95.2	63.2
D7-AE-3	3868	74.8	1064	90.4	115.6	227.2	1392	2124	271.2	1232	80.4	115.6	100	314.4	91.2	69.2
D7-AE-4	668	80	138	90	120.8	273.2	780	536	148	269.2	25	101.6	100.4	256.4	94.4	63.2
D7-AE-5	1728	17.12	784	88	112.8	241.2	1000	1012	233.6	1348	90	103.6	100.4	480	90.4	67.2
D7-AE-6	6320	128.4	7600	118	125.2	1128	2240	2172	1044	3964	277.6	132	103.6	684	112.4	88.8
D7-AE-7	3244	59.6	6000	89.6	110.4	340.4	399.2	608	532	1660	140.8	101.6	102	193.6	120.4	70.8
D7-AE-8	2460	22.2	3668	90	111.2	265.6	500	712	354.4	1332	83.6	104.4	101.2	201.6	104	66.4
D7-AE-9	4840	164	3844	84	108.8	220	219.2	191.2	178.8	3060	100	100.4	103.2	297.6	107.6	63.2
D7-AE-10	4160	37.56	3188	92.8	112.4	472	1324	1740	628	2220	102.8	113.2	102	492	98.8	75.6
D14-control-1	964	168.4	764	80.4	129.2	114.8	185.6	92.8	103.6	884	72	98	101.6	211.2	92.4	62.4
D14-control-2	92.8	10.16	102	84	145.6	140	192.8	126	104.8	324.8	23.8	98	101.6	247.2	92	62
D14-control-3	154.4	73.6	217.2	80.8	129.2	100.4	120.4	74	101.2	512	36.12	97.2	101.2	216	90.4	62
D14-control-4	640	61.6	322	88	172.8	220	316	124.8	109.2	269.6	44.4	99.6	102.4	228	93.2	62.4
D14-control-5	792	103.2	87.6	80	122.4	81.6	131.2	112.4	102	628	23.92	112	100.4	164	96.4	61.6
D14-control-6	200.4	20	44.4	81.6	127.2	155.2	298.8	144.8	105.6	293.2	17.52	96.4	104.4	178	103.6	62.8
D14-control-7	166.8	20.2	103.6	83.2	117.6	186.8	209.6	123.6	114	432	28.04	94.8	104.8	232.8	101.2	62.4
D14-control-8	1808	106	2100	82.8	125.2	244	279.2	84.4	105.6	1452	42.8	95.2	110	317.2	115.2	62
D14-control-9	153.2	20	23.44	82.4	118.8	132.4	244.8	123.2	104	211.2	16.08	95.6	102.4	154	95.6	62
D14-control-10	144.4	42.8	162.8	84.4	123.6	229.6	242.4	136.4	122	604	35.76	94.8	105.6	289.2	130.8	62.4
D14-EPE-H-1	972	238.4	1216	89.2	123.2	124.4	155.6	123.6	128	1880	185.2	118	104	198	116.8	64
D14-EPE-H-2	804	165.6	752	82.4	113.6	94	131.6	90.8	108.4	936	89.2	102.8	105.6	146.4	97.6	62
D14-EPE-H-3	772	156.8	1224	84.4	114.4	108.8	137.6	110.4	123.2	912	154.4	110.4	101.6	149.6	104	63.6
D14-EPE-H-4	1132	239.6	2340	84.4	116.4	121.6	148.4	130.8	135.2	1072	158.8	111.2	102	143.6	103.6	63.6
D14-EPE-H-5	764	174	1500	85.6	118.4	133.2	188.8	84	116	1012	106.8	100	102	151.6	97.6	63.2
D14-EPE-H-6	1236	53.6	3784	86	113.6	192	154.8	92	149.6	1004	50.8	96.4	106	135.6	140.4	63.2
D14-EPE-H-7	2040	150.4	6520	89.6	115.6	476	436	210	239.6	1136	133.2	101.6	107.6	170.4	141.6	65.2
D14-EPE-H-8	1792	134.4	5800	90.4	112.4	460	440	206.4	236.4	844	126.4	101.2	106	166.8	126.8	65.6
D14-EPE-H-9	1248	111.6	3160	84.4	107.6	141.2	159.6	80.8	110.4	1400	62.8	95.6	104.8	151.2	152.8	62.4
D14-EPE-H-10	1664	143.6	5080	89.6	110.8	327.6	328.8	152.4	183.6	1224	109.6	98	106	166.8	140.4	63.6
D14-DCME-H-1	2460	152	1320	80	109.2	90.8	142.4	123.6	115.6	908	65.2	102.8	100.8	138.4	93.6	62.4
D14-DCME-H-2	3424	344.4	1796	81.6	114.8	103.2	200	299.2	143.2	2676	114.8	128	102	172	116	65.2
D14-DCME-H-3	2256	120.4	1176	80.4	108.4	97.6	195.6	155.2	118	976	54.8	101.2	100.8	139.2	98.8	62.8
D14-DCME-H-4	1596	169.2	263.2	81.6	118	88.8	190.4	156.4	104.8	484	29.4	107.2	100.4	157.2	98	62
D14-DCME-H-5	3480	134	1500	87.6	118.4	144.4	700	256.4	134.4	668	76.4	102.4	101.2	165.6	94	63.2
D14-DCME-H-6	2404	428	3952	87.6	116.8	158.4	234.4	101.6	110.8	2048	110	99.2	106	172.4	130.4	62.4
D14-DCME-H-7	1460	208.4	3016	85.2	109.6	144.8	171.2	70.4	104	1348	54	95.6	105.6	146	116	62
D14-DCME-H-8	1072	163.2	3400	86	111.2	180.8	168.4	78.4	114	1240	70.4	96.4	104.8	154.4	112	62
D14-DCME-H-9	1620	266.4	2052	83.2	112	126.8	173.6	104.8	110.4	1268	92.4	98.8	102.4	148.4	110.4	62
D14-DCME-H-10	1260	164.4	2496	82.4	115.6	131.2	146.4	68	102.8	1092	46.8	94	104.4	137.6	110	62
D14-AE-1	2676	776	4520	141.6	246	552	1148	208.4	159.2	3652	492	125.6	116	592	183.6	65.6
D14-AE-2	1028	145.2	1216	81.6	114	112.4	167.6	83.6	105.2	632	59.6	99.6	100.8	140.4	94	62.4
D14-AE-3	2580	397.2	4880	92.8	122.8	183.2	307.2	245.6	201.6	3064	207.6	125.6	105.6	205.2	200.8	65.2
D14-AE-4	2348	260.8	4200	84.8	114	145.2	209.6	210.8	172.8	1692	210.8	113.2	103.2	146.4	144.8	64.4
D14-AE-5	1212	156	2076	79.6	109.2	99.2	118	79.6	114	912	87.6	99.2	101.6	124.4	97.6	62
D14-AE-6	1968	74.4	2784	84.4	115.2	150	254.8	134.8	124.4	1364	53.2	96.8	101.2	167.6	102	62.4
D14-AE-7	1148	21.28	2192	84.8	110.8	152.8	186.8	137.2	144.8	636	27.88	96.4	101.2	134	98	62
D14-AE-8	3580	117.6	2160	94.8	113.6	213.6	892	272.8	134.4	1540	60.4	98.4	102	247.6	130	62.8
D14-AE-9	3188	213.2	10160	91.6	111.6	314.8	310.4	178.4	212.8	2412	222.8	101.2	104.8	179.6	165.2	63.2
D14-AE-10	2560	158.8	6120	88.4	112	146.8	130.4	163.6	209.2	2416	83.6	100.8	103.2	139.6	181.2	64.8
D28-control-1	83.6	14.28	3.048	80.4	136.8	79.6	140	70.8	96	118.8	21.04	96	100	146.4	94	62
D28-control-2	504	70	62	86	144.4	94	232	83.2	99.6	500	18.28	96.8	100	254	92.8	62
D28-control-3	1400	194.8	976	84.4	124	108.4	157.6	77.2	101.2	780	84.8	98.4	101.6	184.8	94	62
D28-control-4	213.2	14.84	25.96	82	131.6	95.6	142	80	100.8	384.4	15.6	98.8	100.4	193.2	90.4	62
D28-control-5	1476	147.6	436	83.2	120	92.8	162.4	73.2	100.4	1076	46.4	96.8	100.4	211.2	91.2	62
D28-control-6	260	40	236	85.2	117.6	224.4	320	153.2	115.2	351.2	16.04	94.4	102.4	259.2	100.4	62
D28-control-7	353.2	39.32	424	81.2	118	158.8	232.8	93.6	103.2	480	15.96	94.8	102	235.2	98.4	62
D28-control-8	116.8	40	28.56	82	116.8	153.2	378	132	103.6	325.6	15.92	94.8	101.2	255.2	92	62
D28-control-9	1276	45.2	2120	82.8	115.2	222	273.6	87.6	107.2	1332	22.64	96.4	104.8	296.8	120.8	62
D28-control-10	266	9.52	313.2	82	114	152	198.8	84.8	103.2	452	16.12	94.8	101.2	240.4	94.4	62
D28-EPE-H-1	5240	280.8	7760	102	118.8	278	580	1380	636	3028	804	154.4	102.4	166.4	138.8	100.8
D28-EPE-H-2	8720	992	13560	111.6	122.8	303.6	380	640	464	12920	3008	154.4	104.8	214.4	275.6	100.8
D28-EPE-H-3	5160	321.6	11920	94.8	113.6	316.4	381.6	816	684	3232	760	140	102	155.2	166.4	86.8
D28-EPE-H-4	9120	836	17000	112.8	120.4	440	556	1152	884	9880	2808	167.6	103.2	180	231.2	116
D28-EPE-H-5	6680	1084	17720	110	115.2	263.6	353.2	608	412	10000	5240	137.6	102.8	150.8	281.6	92
D28-EPE-H-6	6080	144.4	7840	106	128.4	1156	1600	2580	1600	1944	222	164.4	118	266	243.6	94
D28-EPE-H-7	2884	168.8	6440	88.8	115.2	220	258	604	524	1752	139.2	122.8	104	144.8	256	71.6
D28-EPE-H-8	5720	172.8	6880	88.4	111.6	218	216	436	350.4	2284	98.4	106.8	104.4	138	235.2	69.2
D28-EPE-H-9	3596	181.2	4680	96.4	117.2	374	476	820	504	1540	270.4	130.8	112.4	173.6	223.2	75.2
D28-EPE-H-10	2752	132	3480	93.2	112	273.2	341.6	544	367.6	1320	199.6	118.4	108.4	156.8	183.6	71.6
D28-DCME-H-1	7000	804	3460	92.4	140	200.4	796	1508	300	3464	389.6	216.4	102.4	218.4	141.6	75.6
D28-DCME-H-2	7840	1348	12360	100	155.6	345.6	676	988	468	5200	796	232	103.2	232.4	185.2	78.8
D28-DCME-H-3	3288	119.6	1304	86	115.2	146.8	600	768	194.8	800	49.6	120.4	101.2	156	99.6	66.4
D28-DCME-H-4	3864	868	2008	86	121.2	99.2	210	500	166	4120	286	199.6	102	182.4	151.2	68.4
D28-DCME-H-5	3560	584	3116	85.6	122	134.8	271.2	428	182	2984	203.2	152.4	102.4	187.6	132.4	66.4
D28-DCME-H-6	5600	333.2	4760	86.4	111.6	125.6	198.4	636	256.8	6040	231.6	117.6	102	158.4	243.6	69.2
D28-DCME-H-7	1540	78.8	2052	83.2	112.4	114.8	186.4	339.6	206.4	1048	32.56	111.2	100.4	130.4	112.4	82
D28-DCME-H-8	1040	39.36	612	85.2	112	114	286.4	192.8	120.8	680	29.44	99.6	101.6	150.4	95.6	63.2
D28-DCME-H-9	772	68.8	796	82	114.4	102.8	163.2	158.4	126.8	952	44.8	103.2	102	148	100	63.6
D28-DCME-H-10	2016	54	1396	91.2	115.2	148.8	488	460	169.2	924	29.52	105.6	101.6	166.4	104	65.6
D28-AE-1	8640	508	13560	108	124	560	1028	2476	1316	7240	1032	175.2	102.4	236.4	242.8	115.6
D28-AE-2	7560	492	10640	89.6	112.4	186.4	334.8	800	440	6680	820	139.6	101.2	154.4	198.4	79.6
D28-AE-3	4280	448	6960	97.6	115.2	209.6	332.8	444	274	5200	644	125.6	102	206.4	193.2	73.2
D28-AE-4	5840	300.8	6600	90.4	112.4	194.8	412	564	274.4	3780	360.4	121.6	101.2	172	144.8	70
D28-AE-5	3512	323.2	5720	101.2	126.8	285.2	532	1032	548	3412	330.8	166	102.4	214.8	149.2	86
D28-AE-6	5600	202.4	8360	94.8	117.2	560	844	1048	632	5400	148	124.8	113.2	296.8	286	75.2
D28-AE-7	7240	102	9240	104	116.4	1004	1796	4160	2292	3396	131.2	156.4	109.2	292.4	206.4	111.2
D28-AE-8	7240	380.4	10200	92.4	113.6	298.8	444	576	308.4	7360	182.8	119.6	103.6	276	264.8	70.4
D28-AE-9	2216	35.04	2604	88.4	111.6	362.8	524	580	327.6	852	33.96	109.2	106	183.2	127.2	66.4
D28-AE-10	8280	210	10440	98	113.6	524	1100	1772	720	4840	176.8	125.2	106.8	246.8	303.6	88.4
QC50-1	45.1	50.3	45.2	49.2	58.4	48.9	51.3	45.4	55.3	49	43	52.3	55.6	57.7	58.4	44.6
QC500-2	470	741	598	466	465	438	482	418	440	470	537	414	447	454	451	406
QC2500-3	2220	3480	3230	2550	2500	2480	2700	2300	2350	2540	2890	2280	2460	2530	2680	2240
QC50-4	46	50.4	44.7	49.7	58.9	50.1	51.5	46.3	54.9	49.4	44.4	53.8	55.8	57.9	57.1	45.3
QC500-5	479	735	612	440	449	432	467	417	431	463	530	416	441	433	466	399
QC2500-6	2360	3610	3280	2530	2550	2480	2660	2410	2430	2640	2950	2350	2510	2510	2730	2320
QC50-7	44.8	49.2	45.6	45.3	55.7	47.8	47.1	45.8	54.9	47.6	44.5	53.3	55.2	57	56.1	43.5
QC500-8	485	742	601	424	434	423	432	420	437	484	542	422	434	422	473	406
QC2500-9	2300	3500	3170	2370	2350	2290	2390	2230	2300	2520	2870	2310	2330	2330	2520	2240
QC50-10	45.6	50.4	46.5	51.8	59.7	50.1	53.5	46.9	55.4	48.2	43.2	53.6	58.4	58.8	56.5	44.7
QC500-11	483	754	614	492	504	470	513	434	446	466	542	450	492	483	488	422
QC2500-12	2140	3320	3080	2620	2640	2520	2830	2390	2430	2440	2760	2300	2550	2650	2710	2270
QC50-13	44.9	51.1	44.8	54	59.5	48.9	50.3	45.3	54.8	47.5	42.1	51.9	56.5	59.2	57.5	44.6
QC500-14	478	734	605	463	454	433	483	415	429	455	521	410	444	444	480	396
QC2500-15	2210	3470	3180	2750	2720	2560	2780	2410	2440	2560	2870	2370	2560	2650	2740	2320
